CORRECTION

# Correction: Comprehensive Mapping of the *Escherichia coli* Flagellar Regulatory Network

Devon M. Fitzgerald, Richard P. Bonocora, Joseph T. Wade

The email address for the corresponding author is incorrect. The correct email address is: [joseph.wade@health.ny.gov](mailto:joseph.wade@health.ny.gov).

The section entitled “ChIP-seq data analysis” in the Materials and Methods section mentions reference [54]. This is incorrect. Instead reference [63] should be cited. The correct text is included here:

Once T1 and T2 were chosen, peak calling was performed as previously described (Supplementary Material of [63]). Briefly, a region was identified as a peak if both replicates showed enrichment above the corresponding thresholds for each strand. For a peak to be called there must be a peak on the plus strand within a threshold distance of a peak on the minus strand, as previously described (Supplementary Material of [63]).

## Reference

1. Fitzgerald DM, Bonocora RP, Wade JT (2014) Comprehensive Mapping of the *Escherichia coli* Flagellar Regulatory Network. PLoS Genet 10(10): e1004649. doi: [10.1371/journal.pgen.1004649](https://doi.org/10.1371/journal.pgen.1004649) PMID: [25275371](https://pubmed.ncbi.nlm.nih.gov/25275371/)

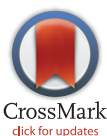

## OPEN ACCESS

**Citation:** Fitzgerald DM, Bonocora RP, Wade JT (2015) Correction: Comprehensive Mapping of the *Escherichia coli* Flagellar Regulatory Network. PLoS Genet 11(9): e1005456. doi:10.1371/journal.pgen.1005456

**Published:** September 17, 2015

**Copyright:** © 2015 Fitzgerald et al. This is an open access article distributed under the terms of the [Creative Commons Attribution License](https://creativecommons.org/licenses/by/4.0/), which permits unrestricted use, distribution, and reproduction in any medium, provided the original author and source are credited.
